# Supplementary material
Source: Research Square preprint supplement (doi:10.21203/rs.3.rs-9900934/v1)
Supplement: Supplementary file 1 [file 284040aa9b49d87a3cfc78c4.docx]

Questionnaire on Satisfaction with Smart Health and Elderly Care Services and Innovation Driving Factors

Dear Respondent:

Hello! In the context of the accelerating global aging population, Smart Health and Elderly Care as an emerging health care model that integrates modern technology, ecological environmental protection concepts and diversified services is gradually becoming an important way to address the challenges of aging and improve the health level of the nation. New quality productivity, as a representative of advanced productivity, providing strong impetus and support for the development of Smart Health and Elderly Care.This questionnaire aims to provide a comprehensive and in-depth understanding of user satisfaction with current Smart Health and Elderly Care and the driving factors behind them. we expect to accurately grasp the achievements and shortcomings of smart health care in practical applications, and provide scientific and objective data support for government decision-making, enterprise innovation and the participation of all sectors of society.

Your participation in this survey is entirely voluntary. You have the right to refuse to answer any question or to withdraw from the survey at any time without providing a reason, and without any negative consequences to you.

All information you provide will be used solely for academic research purposes. Your responses will be treated with strict confidentiality. Your answers will remain completely anonymous, with no personally identifiable information collected or stored in any form traceable to your responses.All data will be anonymised and aggregated for statistical analysis only.

This study has undergone rigorous review and has received formal approval from the relevant ethics committee and institutional review board, where applicable. The research strictly adheres to the foundational principles of the Declaration of Helsinki and complies with all relevant data protection regulations.

By completing and submitting this questionnaire, you indicate that you have read and understood the above information and that you consent to participate voluntarily.

**Basic information**

1. Your gender is

A. Male B. female

2. Your age is

A. Under 60
B. 60-69 C. 70-79 D. Over 80

3. Your highest educational attainment is

A. Primary school and below B. Junior high school C. High school or technical secondary school D. College or undergraduate E. Graduate and above

**Smart Health and Elderly Care Services Satisfaction Scale**

**(Based on your personal experience, please rate your satisfaction with the five aspects of services provided by the Smart Eldercare Institution. 5-1 indicates very satisfied, fairly satisfied, satisfied, fairly dissatisfied, and very dissatisfied respectively.)**

| Indicators | Details | Very satisfied → very dissatisfied | | | | |
| --- | --- | --- | --- | --- | --- | --- |
| Institutional conditions | You think the infrastructure of Smart Eldercare Institution is well-developed and intelligent | 5 | 4 | 3 | 2 | 1 |
| You think the environment of the Smart Eldercare Institution is superior | 5 | 4 | 3 | 2 | 1 |
| You think the fees at Smart Eldercare Institution are reasonable | 5 | 4 | 3 | 2 | 1 |
| Life care | You think the diet of Smart Eldercare Institution is scientifically healthy | 5 | 4 | 3 | 2 | 1 |
| You think the staff at Smart Eldercare Institution are professional | 5 | 4 | 3 | 2 | 1 |
| You think that Smart Eldercare Institution can provide services in a timely manner | 5 | 4 | 3 | 2 | 1 |
| Ensuring medical care | You think the medical facilities in Smart Eldercare Institution are sound and smart | 5 | 4 | 3 | 2 | 1 |
| You think the care services in Smart Eldercare Institution are professional | 5 | 4 | 3 | 2 | 1 |
| You think Smart Eldercare Institution can provide personalized medical care services | 5 | 4 | 3 | 2 | 1 |
| Spiritual comfort | You think the entertainment and cultural activities of the Smart Eldercare Institution are rich and diverse | 5 | 4 | 3 | 2 | 1 |
| You think the psychological services of the Smart Eldercare Institution are well-developed | 5 | 4 | 3 | 2 | 1 |
| You think volunteer services at Smart Eldercare Institution are frequent and effective | 5 | 4 | 3 | 2 | 1 |
| Service elements | You think the Smart Health and Elderly Care Services platform system is fully functional | 5 | 4 | 3 | 2 | 1 |
| You think the Smart Health and Elderly Care Services platform of the Smart Eldercare Institution is safe | 5 | 4 | 3 | 2 | 1 |
| You think the the Smart Eldercare Institution has a professional technical team to ensure the operation of the platform | 5 | 4 | 3 | 2 | 1 |
| Service Management | What you think the Smart Eldercare Institution meet personalized needs and preferences | 5 | 4 | 3 | 2 | 1 |
| You think the service demand evaluation, complaint and feedback mechanism of the the Smart Eldercare Institution is well-developed | 5 | 4 | 3 | 2 | 1 |
| You think the service management mechanism of the Smart Eldercare Institution is perfect | 5 | 4 | 3 | 2 | 1 |

**Innovation-driven scale**

**(Based on your experience or understanding of Smart Health and Elderly Care services, please evaluate the impact of the following five innovation drivers on service quality and rate their importance. 5-1 indicates very important, relatively important, important, relatively less important, and very less important respectively.)**

| Indicators | Details | Very important → very unimportant | | | | |
| --- | --- | --- | --- | --- | --- | --- |
| Technology  Innovation | Technology integration | 5 | 4 | 3 | 2 | 1 |
| Technology maturity | 5 | 4 | 3 | 2 | 1 |
| Technology integration | 5 | 4 | 3 | 2 | 1 |
| Market-driven | Market demand | 5 | 4 | 3 | 2 | 1 |
| User satisfaction | 5 | 4 | 3 | 2 | 1 |
| Market regulation | 5 | 4 | 3 | 2 | 1 |
| Industry convergence | Novelty of business forms | 5 | 4 | 3 | 2 | 1 |
| Industrial coordination | 5 | 4 | 3 | 2 | 1 |
| Orderly development | 5 | 4 | 3 | 2 | 1 |
| Talent-driven | Talent professionalism | 5 | 4 | 3 | 2 | 1 |
| Training sophistication | 5 | 4 | 3 | 2 | 1 |
| Teamwork | 5 | 4 | 3 | 2 | 1 |
| Policy-driven | Policy support | 5 | 4 | 3 | 2 | 1 |
| Legal soundness | 5 | 4 | 3 | 2 | 1 |
| Regulatory effectiveness | 5 | 4 | 3 | 2 | 1 |

What suggestions do you have for the further development of smart health care

**Thank you again for your filling. Wish you a happy life!**
