# Supplementary material
Source: Research Square preprint supplement (doi:10.21203/rs.3.rs-9900934/v1)
Supplement: Supplementary file 2 [file f1555c1d9fd64da3ba9927a2.xlsx]

## Sheet: Sheet1
gender	age	highest educational attainment	Well-equipped	Comfortable environment	Reasonable charges	Healthy diet	Professional care	Prompt service	Device intelligence	Healthcare professionals	Emergency response	Rich entertainment	Psychological services	Volunteer care	Platform functionality	Data security	Team assurance	Personalized service	Sound mechanism	Management norms	Technology integration	Technology maturity	Technology integration	Market demand	User satisfaction	Market regulation	Novelty of business forms	Industrial coordination	Orderly development	Talent professionalism	Training sophistication	Teamwork	Policy support	Legal soundness	Regulatory effectiveness
1	3	2	4	3	3	5	5	5	4	4	5	4	4	5	4	3	3	4	4	4	4	3	3	4	4	3	3	4	4	4	3	4	3	5	4
1	2	2	5	5	3	4	5	5	4	4	5	4	4	4	5	3	4	4	4	5	5	5	4	4	5	4	4	5	4	4	3	5	4	4	5
1	3	1	4	4	3	5	5	4	5	4	4	3	4	4	4	3	3	4	4	4	4	4	5	4	5	4	5	5	5	5	5	3	5	5	5
2	2	2	4	4	3	4	4	4	4	3	4	3	4	3	4	3	4	3	5	2	4	4	3	5	5	4	4	4	4	4	3	4	4	4	4
2	2	1	3	3	2	4	4	5	4	3	2	5	3	3	5	3	4	3	5	4	5	5	5	5	5	5	4	3	3	5	5	4	5	5	4
1	2	2	5	4	3	4	4	4	4	3	5	4	4	5	4	3	5	5	4	4	5	5	4	5	5	4	4	4	5	4	4	4	5	4	4
1	3	1	3	4	2	4	4	3	3	3	3	5	4	3	4	3	4	4	3	4	3	4	4	3	3	5	4	3	3	4	4	3	5	4	3
1	2	2	4	4	2	4	3	3	4	4	4	4	4	5	4	3	3	5	4	4	5	4	5	5	4	4	5	3	4	5	4	5	5	5	4
1	3	3	4	4	2	3	4	3	3	4	4	2	3	4	4	2	3	5	3	3	5	3	4	5	4	3	3	3	5	3	3	5	4	4	5
2	3	3	4	3	2	4	4	4	4	3	5	3	4	4	5	4	4	4	4	5	4	5	4	5	4	5	4	5	5	3	3	4	4	5	4
2	2	3	3	4	3	5	4	3	2	4	4	3	4	5	4	2	4	4	5	5	5	4	4	5	5	4	4	4	5	3	4	4	4	4	5
1	3	2	4	2	3	3	5	2	4	3	5	4	3	4	5	3	4	3	4	5	5	4	4	4	5	4	4	4	4	2	3	4	5	4	4
2	3	2	5	3	4	4	5	4	4	5	5	4	4	4	4	5	3	3	3	4	5	4	5	4	4	3	4	3	4	5	4	4	5	4	4
2	2	4	3	4	3	3	3	2	2	2	3	2	3	2	2	2	3	2	2	3	2	3	1	4	3	4	4	3	4	4	3	3	3	2	2
2	2	4	4	3	3	4	5	5	5	5	5	3	3	5	4	3	5	3	5	5	5	5	5	5	5	5	3	5	3	3	4	2	5	3	3
1	1	2	2	1	3	4	2	2	3	2	3	4	2	4	4	4	4	3	5	4	4	3	2	4	4	3	2	3	3	3	4	3	2	4	2
1	1	2	5	3	5	4	4	4	4	4	4	3	3	4	4	3	5	4	4	2	3	2	2	4	2	4	2	2	2	4	4	4	2	2	2
1	3	1	5	5	5	5	5	5	5	5	5	5	5	5	3	3	5	5	5	5	5	5	5	4	3	2	2	3	3	5	4	5	4	2	3
2	2	4	4	2	2	4	4	4	3	1	2	3	3	4	3	2	2	5	3	4	5	3	4	2	3	3	3	3	3	3	2	3	3	2	2
1	3	3	4	4	3	3	5	4	4	3	4	1	2	2	2	3	2	5	4	4	4	4	5	4	2	4	4	3	4	2	3	2	1	1	2
1	2	1	5	5	5	5	5	5	5	5	5	5	5	5	5	5	5	5	5	5	5	5	5	5	5	5	5	5	5	5	5	5	5	5	5
1	2	4	4	5	5	3	3	5	5	5	5	3	5	5	5	5	5	5	5	5	5	5	4	3	5	5	3	4	3	4	5	5	4	5	4
2	2	2	2	3	2	4	4	5	2	4	2	4	4	4	2	2	2	4	5	4	2	3	2	3	4	2	4	2	2	4	3	3	2	4	2
2	1	2	5	5	5	3	4	3	3	3	2	4	3	3	4	5	5	5	5	3	5	3	5	4	5	4	5	5	4	5	4	4	3	5	3
2	1	2	4	2	2	2	1	2	2	2	3	2	2	2	3	4	4	3	1	1	1	2	1	3	2	4	1	2	2	4	4	4	4	3	4
1	2	2	2	3	2	3	3	4	2	4	2	2	4	2	2	3	2	4	4	5	2	2	2	2	2	2	5	3	5	2	3	2	5	4	4
1	2	1	3	2	2	4	3	4	2	2	2	2	2	3	2	4	2	4	4	3	3	4	4	2	3	2	4	4	4	3	2	3	5	3	4
1	1	4	4	5	5	5	5	4	4	5	5	3	3	3	5	3	3	3	5	3	5	5	5	5	5	4	5	5	4	3	3	3	4	5	4
1	1	1	5	5	5	5	3	3	5	5	3	5	3	5	5	5	5	5	5	5	3	3	3	4	3	5	5	4	5	3	3	3	5	4	5
1	2	4	3	3	1	4	2	2	2	4	2	2	3	2	2	2	2	3	4	4	1	3	1	3	3	2	2	2	2	2	2	3	2	4	4
1	1	5	2	4	3	1	2	2	4	4	4	2	2	3	3	5	4	4	3	2	4	2	3	4	4	5	2	1	1	5	4	4	4	2	2
1	2	2	4	2	2	2	1	2	4	4	5	2	2	2	3	4	2	3	4	3	2	4	4	2	3	2	2	1	3	4	4	4	2	4	2
2	1	2	3	4	3	3	2	3	4	3	4	2	4	4	2	4	3	4	2	3	4	4	3	1	2	1	2	2	2	4	4	4	4	2	4
2	2	4	5	4	5	3	3	4	3	5	3	5	4	5	5	4	5	4	5	5	3	3	5	3	3	4	3	3	2	3	5	4	3	5	5
2	2	4	3	2	4	2	2	2	4	4	2	1	2	3	3	4	5	2	4	2	2	2	4	3	3	5	4	2	2	4	4	4	4	3	4
1	2	1	5	5	5	5	5	5	5	5	3	5	5	5	4	2	2	3	3	3	4	3	4	5	5	5	4	4	4	3	5	4	3	3	5
2	2	2	2	2	2	4	4	4	2	2	4	4	5	4	3	2	4	4	3	2	4	5	4	4	4	3	5	4	4	4	4	4	2	1	3
2	3	1	3	4	3	2	3	3	4	3	4	2	2	2	4	2	3	4	2	2	2	3	4	2	2	2	2	4	2	2	2	4	2	3	1
2	2	2	5	5	5	5	5	5	5	5	5	4	5	5	3	3	3	5	5	3	3	5	3	2	3	3	3	5	3	3	3	3	3	3	3
2	3	2	5	5	5	5	5	5	5	5	5	4	4	4	4	5	5	5	5	5	5	5	5	5	5	4	4	5	5	5	5	5	5	5	5
1	2	1	3	2	3	1	2	2	2	2	1	4	2	3	4	5	4	2	4	4	2	2	2	4	5	4	4	2	4	2	2	1	4	4	3
1	2	2	3	3	4	5	5	3	5	3	3	2	3	3	3	3	4	4	5	4	4	3	3	4	4	3	3	3	2	5	5	5	5	5	5
2	2	1	5	5	5	5	5	5	5	5	5	5	5	5	5	5	5	5	5	5	5	5	5	5	5	5	5	5	5	5	5	5	5	5	5
2	2	1	3	5	5	5	5	5	3	3	5	4	5	4	4	3	2	3	4	5	5	4	3	3	3	2	4	5	5	5	3	5	5	5	5
1	2	2	2	2	3	3	4	4	2	2	3	3	2	2	1	3	2	2	3	3	3	2	1	2	2	2	4	4	4	4	5	5	5	5	5
2	2	1	2	3	4	4	2	3	5	4	4	4	3	5	2	4	4	2	2	3	4	4	3	4	4	4	2	2	1	3	2	2	3	4	2
2	2	4	4	5	4	2	3	4	1	2	1	2	2	2	1	2	2	3	2	4	4	3	4	3	3	4	2	2	4	1	3	1	2	4	2
2	2	4	3	2	3	2	1	2	2	2	2	1	2	2	4	3	4	4	4	3	2	4	4	4	4	3	2	1	2	2	2	2	2	2	1
2	2	4	4	4	4	3	2	4	3	2	2	4	4	2	3	3	5	2	3	2	2	2	3	4	4	4	3	4	3	2	2	2	3	2	2
1	2	1	2	2	2	2	2	1	2	3	2	4	4	3	5	5	4	3	5	4	1	1	2	2	2	2	3	2	4	2	2	3	3	4	4
1	4	1	4	5	5	3	4	3	5	5	5	5	5	3	5	5	5	4	3	5	3	4	3	5	5	5	3	3	5	4	4	5	5	3	5
1	2	4	2	2	4	4	2	4	2	2	2	3	3	3	1	1	1	4	2	2	1	1	3	1	3	2	3	3	3	4	4	3	1	2	1
1	3	1	5	5	5	5	5	5	3	3	4	5	5	5	5	3	3	5	3	4	4	5	5	3	2	2	3	5	4	5	4	4	5	3	3
1	2	2	5	5	5	5	5	4	4	5	5	5	3	3	5	4	5	3	4	5	5	5	3	3	3	5	3	4	3	5	4	5	4	3	3
1	3	2	4	4	4	3	3	4	3	4	4	2	2	1	4	4	2	4	2	4	1	1	2	2	4	4	1	2	2	2	4	2	2	2	2
2	3	3	4	4	2	3	4	4	3	2	1	1	1	3	2	2	2	4	4	4	3	4	3	4	2	2	4	4	4	4	5	4	4	4	2
1	1	1	5	5	5	5	5	3	3	4	3	5	4	5	3	3	4	3	4	3	3	4	3	3	3	3	3	3	4	3	3	2	5	5	5
1	1	4	4	4	4	5	5	3	3	3	2	2	2	3	4	4	3	1	1	3	2	2	4	3	2	4	4	4	3	3	2	4	4	4	4
2	2	2	2	3	3	3	4	3	2	2	2	4	4	4	2	2	2	3	4	3	4	2	3	1	3	2	4	5	4	1	2	1	4	4	4
1	4	1	5	5	5	5	5	5	5	5	5	5	5	5	5	5	5	5	5	5	5	5	5	5	5	5	5	5	5	5	5	5	5	5	5
2	1	2	3	4	2	3	4	4	2	2	2	2	1	1	5	5	4	2	2	3	4	4	3	4	3	4	5	4	5	4	4	4	2	3	1
1	3	3	4	2	3	1	2	1	5	3	5	4	3	4	3	4	4	2	2	1	2	2	3	3	2	4	4	5	4	4	3	4	1	1	3
2	3	1	4	2	3	4	3	2	2	2	2	4	2	2	4	2	4	3	3	4	1	3	2	4	4	3	3	2	4	4	2	4	4	2	3
1	3	1	2	2	3	5	5	4	4	4	2	2	2	3	4	3	4	2	2	3	3	2	2	2	2	2	4	4	2	4	2	4	3	3	2
1	2	2	5	3	4	2	4	2	2	1	2	3	2	1	3	2	3	4	5	4	2	2	2	4	2	4	1	2	3	2	2	2	4	3	3
2	1	1	3	3	5	4	3	3	4	5	4	3	5	3	3	4	5	5	5	5	5	4	5	4	3	3	3	4	2	3	5	3	5	4	5
1	2	2	5	3	4	3	3	3	2	3	3	3	3	4	5	5	5	4	3	2	5	5	5	3	5	5	4	5	5	3	4	4	3	5	5
2	2	4	3	1	2	4	4	4	4	4	4	2	3	2	2	2	2	1	3	3	4	4	4	3	2	2	4	4	4	4	4	3	3	3	4
2	2	1	2	4	4	2	4	2	3	2	3	3	2	2	2	4	2	3	4	2	1	2	3	4	4	4	4	4	3	5	4	3	4	4	4
2	2	2	2	2	4	4	4	4	4	3	4	2	2	1	1	1	2	4	4	4	4	3	3	2	2	2	2	1	3	3	2	4	3	3	3
1	3	3	4	3	4	3	1	3	4	4	2	2	1	2	1	1	2	4	4	5	4	4	4	2	1	2	2	2	4	3	4	3	2	2	4
1	1	2	2	2	3	2	1	3	4	4	3	4	3	2	4	4	3	3	4	5	3	2	2	2	4	4	2	3	2	3	3	2	4	4	5
1	3	2	5	3	4	5	4	3	4	4	3	4	4	5	5	3	4	5	5	5	3	4	4	4	3	3	5	4	5	3	3	5	5	4	4
1	4	1	3	4	3	3	2	3	3	5	4	5	5	5	3	3	3	5	4	5	5	5	5	5	4	5	5	5	4	4	2	3	3	3	4
1	2	2	4	3	3	4	2	4	2	4	4	3	4	3	4	2	4	1	2	3	3	2	4	4	4	2	2	3	2	2	2	2	2	3	2
1	2	1	4	4	3	3	3	2	2	2	2	4	2	4	3	4	4	2	2	2	2	3	2	3	2	4	4	3	3	2	3	3	4	3	2
1	3	1	3	3	3	3	4	3	5	5	5	3	4	3	3	2	2	5	5	5	4	2	2	5	5	3	4	3	5	4	2	3	5	5	4
1	3	1	3	2	3	2	2	1	3	2	3	5	5	4	4	4	4	4	2	2	5	3	4	3	5	3	2	2	3	2	3	2	1	1	3
2	3	3	3	5	4	2	1	2	2	4	2	4	3	2	4	2	4	4	4	4	4	4	4	3	2	3	2	2	4	4	2	2	2	4	4
2	4	1	2	4	3	4	4	4	4	4	4	3	2	3	1	2	2	3	2	2	4	4	4	4	4	2	2	3	3	5	5	4	3	2	2
2	1	1	4	4	4	4	2	2	2	2	2	3	2	3	4	4	2	4	2	4	4	4	4	2	3	4	4	4	4	3	5	3	3	2	3
1	3	1	3	3	2	2	4	4	4	5	5	4	2	2	3	5	4	4	4	2	3	4	4	2	1	1	2	4	2	2	3	3	5	4	5
2	2	1	4	4	4	4	2	4	2	1	1	3	3	3	3	4	5	4	4	4	2	2	4	3	4	4	5	4	4	2	2	2	4	4	4
1	2	1	2	4	2	3	1	2	3	1	2	3	4	4	2	2	3	4	4	3	4	4	4	2	3	2	2	4	3	4	3	4	3	2	2
2	2	1	4	5	3	5	5	5	3	3	2	5	4	5	5	4	5	3	4	3	3	3	3	3	5	3	3	5	3	5	4	5	5	5	5
2	2	2	5	5	5	5	5	4	5	5	5	5	3	3	5	5	5	5	5	5	3	3	2	5	5	5	5	3	5	3	3	2	3	5	3
2	3	1	3	2	2	3	4	4	4	4	4	4	4	4	2	4	3	2	4	2	4	2	2	2	4	3	4	4	4	4	4	2	2	2	1
1	2	2	1	1	3	4	4	4	2	2	1	4	4	2	4	4	4	2	2	4	2	4	4	3	1	1	3	4	4	2	2	4	3	2	4
1	2	2	5	5	5	5	5	5	5	5	5	5	5	5	5	5	5	5	5	5	5	5	5	5	5	5	5	5	5	5	5	5	5	5	5
2	2	2	3	4	3	2	2	2	4	3	3	4	5	5	4	4	4	3	4	2	4	4	3	4	4	4	4	3	4	2	2	1	2	3	4
2	2	2	5	5	3	5	4	3	5	3	3	3	3	4	5	5	5	3	3	3	5	5	4	5	5	5	4	3	3	4	5	3	3	5	3
1	2	1	4	4	4	4	3	4	2	2	2	4	4	4	4	2	2	4	4	4	1	3	2	2	4	4	2	4	4	2	2	4	4	4	4
1	1	1	2	3	2	2	3	4	4	4	4	3	4	4	3	3	3	4	3	2	4	2	2	4	3	4	3	4	3	4	2	4	4	4	4
1	3	1	3	3	5	5	5	5	5	5	5	4	5	5	5	5	5	5	5	5	5	5	5	5	4	4	4	5	4	4	5	5	4	3	5
2	2	1	5	3	4	2	2	4	3	2	2	4	3	4	2	2	2	4	3	4	2	2	2	2	1	2	3	4	2	4	5	4	3	4	2
2	3	1	3	3	5	3	3	4	3	4	5	3	4	5	4	5	4	5	4	3	5	4	5	4	4	5	3	3	3	5	5	5	3	3	4
2	3	1	5	5	5	2	3	3	3	2	2	5	5	5	5	5	5	5	4	5	5	5	4	5	3	3	3	3	5	5	5	4	4	5	5
1	1	1	2	3	2	3	4	3	4	2	2	2	2	2	4	4	4	1	2	2	4	3	4	3	3	1	2	3	1	2	2	4	2	3	3
2	2	1	2	3	2	2	2	4	4	4	4	5	4	3	3	4	4	4	3	3	2	2	2	1	1	2	3	3	4	2	3	3	4	4	4
2	4	1	5	5	5	5	4	3	3	3	5	3	5	5	3	3	3	5	3	5	5	5	4	5	4	3	4	3	3	5	4	5	5	5	5
2	1	2	5	5	5	5	5	5	5	5	5	5	5	5	5	5	5	5	5	5	5	5	5	5	5	5	5	5	5	5	5	5	5	5	5
1	3	1	4	4	2	3	4	3	4	4	4	3	4	4	2	4	2	4	4	4	4	2	2	3	2	2	3	2	4	2	4	2	3	2	4
2	2	2	3	3	2	2	2	3	2	2	2	4	5	3	2	2	2	4	4	2	4	5	5	2	3	4	4	3	3	1	3	2	2	2	3
1	2	2	3	5	5	4	3	3	3	2	4	3	3	3	5	5	4	5	5	5	3	3	5	5	5	5	4	4	4	4	4	5	5	5	4
2	3	1	4	5	3	1	3	2	4	2	4	2	4	4	4	4	4	5	4	4	5	4	5	2	2	1	4	2	4	2	4	4	3	2	2
1	2	2	4	4	4	5	5	4	5	5	4	3	3	4	4	5	3	3	3	5	5	5	5	5	5	4	5	5	4	5	4	5	5	5	4
2	2	2	3	5	4	3	3	3	2	2	2	2	2	2	1	1	2	3	3	3	4	4	4	5	4	3	4	4	4	2	2	2	2	2	1
1	3	1	4	3	3	2	4	4	2	4	2	2	2	2	2	4	4	4	3	3	2	1	2	4	4	5	3	2	2	3	3	2	3	2	2
2	1	2	2	4	3	5	5	5	3	5	5	4	4	3	5	3	5	5	5	5	5	5	5	4	5	5	3	5	3	5	5	5	3	3	5
1	2	2	5	4	5	3	3	3	3	5	4	5	4	5	5	5	4	3	4	5	4	5	5	5	5	4	4	3	4	5	5	5	3	5	5
1	3	1	4	3	4	2	2	4	2	3	2	2	3	4	4	3	4	4	4	2	2	4	2	2	2	2	4	4	4	4	4	4	3	2	3
1	3	1	2	4	4	3	3	2	2	1	1	2	2	2	2	3	2	4	4	4	2	2	3	2	3	2	4	3	2	4	4	4	4	4	4
2	1	2	3	5	5	5	5	4	5	5	5	3	3	4	3	3	5	4	5	5	3	5	5	4	5	5	3	4	3	5	5	5	3	5	5
1	2	2	2	1	1	3	4	4	2	4	4	4	2	2	2	2	2	4	4	4	2	1	2	3	4	3	4	2	3	2	3	3	5	4	5
1	2	4	4	3	2	4	4	3	2	2	2	3	3	4	2	2	2	1	2	2	4	4	4	2	4	4	4	4	3	2	2	3	4	4	2
1	1	2	4	3	4	4	4	4	2	2	1	4	3	4	2	2	2	3	2	3	4	4	4	4	5	5	3	3	3	2	3	2	2	4	2
1	2	2	2	2	2	5	3	4	3	3	1	3	4	3	4	3	3	2	2	3	2	3	2	2	3	3	1	2	2	2	2	4	4	2	4
2	2	2	1	2	3	2	2	4	4	4	2	4	4	4	2	1	1	4	2	4	3	2	2	3	3	2	3	2	4	2	2	4	3	2	4
2	2	2	5	5	5	5	5	5	5	4	4	3	3	5	4	5	5	5	5	5	4	5	5	2	3	3	5	3	5	2	2	2	4	3	3
2	3	1	4	2	4	2	2	4	4	4	4	2	2	2	3	5	4	2	2	2	2	4	2	4	4	3	4	2	4	2	3	3	1	2	2
1	2	4	5	5	5	5	5	5	5	5	5	5	5	5	5	5	5	5	5	5	5	5	5	5	5	5	5	5	5	5	5	5	5	5	5
1	2	4	2	4	4	4	4	4	2	4	2	2	4	2	2	3	2	2	2	2	2	2	3	2	3	2	3	1	2	4	3	4	2	4	2
2	2	4	2	2	2	2	2	2	2	2	2	2	2	2	2	1	2	4	4	4	4	4	4	4	4	3	3	2	2	4	4	2	2	2	4
1	2	4	3	4	2	2	2	2	5	3	4	1	2	3	2	2	1	3	4	5	4	2	3	2	2	3	2	1	2	3	4	3	5	4	4
2	2	2	4	4	4	4	4	4	1	2	1	4	4	4	3	4	3	4	3	4	2	2	2	4	4	2	2	2	3	5	5	4	2	2	2
2	2	2	1	1	1	3	3	2	3	4	4	4	2	2	5	5	4	2	2	4	2	2	2	1	1	2	3	3	1	4	3	4	2	2	3
2	3	2	3	5	5	5	5	5	3	2	4	5	5	5	4	4	5	4	5	4	5	5	5	3	5	4	5	4	4	3	3	3	4	5	3
2	1	2	4	2	4	4	3	2	4	3	3	2	4	4	2	2	3	4	2	2	1	3	3	4	2	4	4	4	4	4	4	2	2	4	2
1	2	2	2	4	2	4	3	3	2	3	2	4	4	4	2	2	2	3	3	4	4	3	2	4	4	3	4	4	4	4	4	3	1	1	3
1	2	2	4	2	2	3	3	4	4	4	4	5	4	4	2	2	2	2	4	2	4	4	4	3	1	3	2	4	2	2	2	2	1	1	2
1	1	4	2	1	2	2	3	4	4	4	4	4	4	2	3	2	4	4	4	2	4	4	4	3	2	3	2	2	2	3	4	5	2	4	2
2	2	4	2	2	4	4	4	4	4	4	3	2	2	4	3	4	4	2	4	3	3	4	3	4	4	2	2	4	3	4	2	3	4	4	4
2	2	2	5	4	4	5	5	5	3	5	5	5	5	5	5	4	5	4	3	3	3	2	4	5	5	5	5	5	4	4	5	3	5	5	5
2	4	1	2	2	3	3	2	3	4	4	3	1	3	2	3	3	2	2	2	4	4	4	4	2	1	3	4	4	2	4	3	5	2	2	2
2	2	2	5	5	5	5	5	5	5	5	5	5	5	5	5	5	5	5	5	5	5	5	5	5	5	5	5	5	5	5	5	5	5	5	5
2	1	2	4	3	4	2	2	4	3	3	4	3	2	2	4	2	2	4	2	2	4	4	4	1	2	2	2	2	2	3	3	4	3	4	4
2	3	1	3	2	2	3	3	4	3	3	2	1	2	2	2	2	2	4	4	3	2	1	3	4	4	3	4	3	2	5	4	5	2	2	3
1	2	2	2	3	2	4	4	3	4	3	4	4	2	4	3	2	2	4	4	3	3	4	3	2	2	4	2	4	2	3	4	4	2	4	2
1	2	2	5	5	5	5	5	4	3	3	3	3	3	4	3	3	3	4	4	4	3	5	4	5	5	5	4	3	3	5	4	5	4	3	3
2	2	2	4	4	2	4	4	2	2	2	2	4	4	4	4	4	4	4	4	2	3	2	2	4	3	3	4	4	4	3	2	4	4	2	4
1	2	2	5	4	3	4	5	5	4	4	4	3	4	5	5	5	3	3	4	5	4	5	3	3	5	5	3	3	4	4	4	3	5	5	5
1	2	2	3	2	2	3	4	4	4	4	2	4	4	3	4	2	2	2	2	2	2	3	2	3	1	2	2	2	3	2	4	2	3	2	2
2	2	4	3	3	3	4	3	3	5	5	5	3	3	3	3	2	3	5	4	5	5	5	3	3	4	3	5	4	5	4	4	5	3	3	5
1	2	2	4	3	4	5	4	3	3	4	2	2	3	1	4	2	3	4	3	4	4	2	4	3	2	2	4	4	3	4	4	3	4	2	2
1	3	2	3	5	5	3	2	3	5	4	5	5	3	5	5	5	5	5	5	4	5	5	5	3	4	3	5	3	4	3	5	3	3	3	3
2	2	4	4	4	5	2	2	3	2	3	3	2	3	3	2	3	2	3	3	2	4	4	3	5	4	4	4	5	4	4	3	4	2	2	2
1	2	4	5	4	4	5	5	5	2	3	3	5	4	5	3	3	4	5	5	3	4	4	5	5	5	5	2	3	3	5	4	5	5	5	5
1	2	4	2	2	4	4	4	4	4	3	2	2	3	4	4	4	5	1	2	3	2	4	2	4	3	4	2	4	4	3	2	2	4	2	2
2	2	4	2	3	1	4	3	2	4	2	4	4	3	4	3	2	2	2	2	2	5	4	3	2	2	2	4	4	4	4	3	4	4	3	3
2	3	1	3	4	4	3	3	3	3	4	3	5	5	5	5	3	3	5	5	4	4	5	5	4	5	3	5	4	5	5	4	5	3	5	3
1	2	2	4	4	3	1	2	1	2	4	4	3	2	2	2	2	2	3	4	2	4	4	2	2	2	2	3	4	2	2	2	3	4	2	4
1	2	4	5	3	3	5	3	4	3	5	5	5	5	4	5	3	3	4	3	3	4	5	5	3	3	2	3	4	3	3	3	3	5	5	3
2	1	4	5	4	5	4	3	3	3	4	3	5	5	4	5	5	5	5	3	5	2	4	2	4	5	3	4	5	5	5	5	5	4	3	3
1	2	2	3	5	5	4	5	5	3	4	3	4	5	3	3	5	5	5	3	3	4	5	5	5	5	4	5	5	3	3	5	3	5	5	5
1	3	2	5	4	4	5	3	5	2	2	2	2	2	4	2	2	2	3	3	1	2	1	3	5	4	4	1	3	2	2	2	3	4	4	5
2	1	4	2	4	2	5	5	4	3	4	4	3	5	4	4	5	5	5	5	5	4	3	3	4	4	5	5	4	5	5	4	3	3	3	4
2	4	1	1	1	2	5	4	3	3	4	3	2	3	2	3	3	3	3	3	2	3	4	2	2	4	4	4	4	4	3	4	4	3	3	2
1	2	1	3	4	3	1	2	2	4	4	2	4	3	4	3	3	4	4	4	2	2	4	4	2	3	2	4	5	5	2	3	3	4	3	4
2	2	1	3	2	4	3	2	2	2	2	2	2	1	2	5	5	3	1	2	2	3	4	4	2	4	4	2	2	4	2	2	2	4	4	4
1	1	1	3	4	4	4	4	2	4	2	4	2	2	2	4	4	4	4	3	3	2	2	3	3	4	3	4	4	5	3	2	1	2	1	1
1	2	1	3	1	1	2	2	2	3	5	5	4	4	4	2	2	3	2	3	4	2	1	2	2	2	4	2	2	2	4	4	4	5	4	4
2	2	4	3	3	4	3	5	4	3	2	2	4	4	4	4	2	4	2	2	1	4	3	3	4	3	2	4	4	4	2	2	2	4	4	4
1	2	2	2	2	4	3	3	2	1	3	2	2	2	1	2	4	2	3	2	4	3	4	2	3	2	3	4	4	5	5	4	5	4	4	2
2	2	4	5	3	4	5	5	5	2	4	3	3	3	3	4	3	3	3	3	3	5	5	4	5	5	5	3	3	3	5	5	4	3	3	4
2	2	4	5	4	3	3	3	5	2	3	4	3	4	3	5	5	4	5	5	4	3	4	3	5	5	5	3	4	4	3	3	3	4	5	4
1	1	4	3	1	3	4	4	4	2	2	4	5	4	4	4	4	3	5	4	4	2	4	2	2	4	4	1	1	2	2	2	2	2	2	1
2	1	2	2	3	4	2	3	2	4	4	3	2	4	3	4	4	3	2	2	2	4	4	4	3	4	2	3	3	3	4	2	2	3	4	4
2	3	1	2	2	2	2	2	2	3	4	4	3	4	4	4	2	4	2	2	2	3	2	2	4	4	4	4	4	4	2	2	2	4	3	4
1	2	4	2	3	2	4	4	3	2	3	4	2	2	3	2	2	2	4	3	2	3	2	2	2	2	2	4	4	4	3	2	4	2	3	1
1	1	4	2	4	2	2	2	3	2	4	4	2	2	4	3	3	5	2	3	1	5	4	4	4	5	3	3	3	4	2	1	1	2	2	2
1	2	4	1	2	3	2	2	2	2	2	3	3	2	4	2	2	2	2	2	3	4	4	3	2	2	4	3	1	2	4	4	4	4	4	2
1	1	4	2	4	3	2	2	3	2	4	2	3	3	4	2	2	2	1	2	3	2	4	3	4	4	3	2	2	2	4	4	4	4	4	2
1	2	2	2	3	3	2	4	2	2	3	1	1	1	3	2	4	2	2	4	4	2	4	4	4	4	4	3	4	3	2	3	2	3	1	2
2	3	1	4	5	5	1	3	1	4	4	2	2	2	4	4	2	2	2	2	2	4	4	4	2	2	4	4	3	5	2	3	4	2	2	2
1	2	2	3	2	2	4	2	2	3	2	4	5	5	5	4	5	4	2	3	2	5	4	4	4	2	4	2	2	3	3	3	2	4	3	4
2	2	2	4	3	4	2	2	2	2	4	4	4	4	3	1	2	2	3	2	4	2	2	2	3	4	4	2	3	2	2	2	2	2	4	2
2	2	1	5	3	3	3	3	5	5	5	5	5	3	3	3	3	3	5	5	3	3	3	3	3	4	4	3	5	5	3	2	3	2	4	3
2	2	1	3	4	3	5	3	3	5	5	5	5	5	5	3	3	3	5	5	4	3	3	3	4	5	3	4	5	5	5	4	5	3	3	4
2	1	1	2	4	2	3	2	3	4	2	3	4	2	4	2	2	1	4	2	3	4	4	4	2	3	3	3	3	2	3	4	4	4	3	4
1	1	1	3	4	3	2	2	4	4	4	5	4	4	4	4	4	2	3	4	2	3	3	3	2	3	2	2	4	3	2	4	2	3	3	3
2	3	1	5	5	5	5	5	5	5	5	5	5	5	5	5	5	5	5	5	5	5	5	5	5	5	5	5	5	5	5	5	5	5	5	5
1	2	1	2	4	2	2	1	2	4	2	2	4	3	4	2	2	2	4	3	4	3	3	5	2	4	4	1	1	3	2	3	2	4	3	4
2	2	1	4	3	2	3	3	3	4	4	4	3	2	2	2	3	2	4	4	4	2	2	2	2	2	1	4	4	3	2	2	1	4	2	2
2	2	1	2	4	3	1	3	3	3	2	2	2	4	2	2	2	2	4	5	5	2	2	3	4	3	3	4	4	2	4	5	5	2	2	3
2	2	2	3	3	2	4	4	3	2	2	2	2	2	1	4	3	3	2	2	2	2	2	3	4	2	4	2	2	1	3	3	4	2	2	2
1	2	4	4	5	5	4	4	5	3	3	2	5	3	4	4	5	5	4	5	5	3	5	3	3	4	3	3	3	3	5	4	4	5	5	5
2	4	1	1	1	2	4	4	4	4	4	3	3	3	4	4	4	3	3	4	4	4	4	3	4	2	4	2	4	4	4	2	2	2	3	4
2	2	2	4	2	2	2	2	4	4	4	4	2	2	4	2	4	2	2	4	2	4	4	3	3	3	4	2	1	3	3	2	3	3	2	2
1	2	2	3	4	4	3	2	2	2	4	3	4	4	4	2	3	3	2	2	3	2	2	2	4	4	3	4	3	4	2	2	2	4	4	4
2	2	2	5	5	4	5	4	4	3	2	4	2	3	2	4	2	2	4	2	2	4	4	3	3	5	3	5	5	3	3	3	2	4	3	2
2	2	2	3	3	4	2	4	4	4	2	2	4	3	2	2	2	2	2	1	2	3	2	2	2	3	2	4	3	4	2	2	4	2	3	4
1	1	2	4	5	5	3	5	4	3	3	2	3	5	3	3	4	3	5	5	5	3	4	3	4	5	4	3	3	4	5	3	5	4	4	3
2	3	1	3	2	2	4	2	2	2	2	3	4	4	2	3	2	1	4	2	4	4	3	2	4	3	4	2	4	2	1	2	2	2	3	2
1	4	1	4	4	4	1	2	2	5	4	5	3	4	3	3	2	3	2	3	2	4	2	3	4	4	4	2	2	2	2	1	2	2	4	3
1	2	1	2	2	3	2	4	2	2	2	2	3	3	2	2	2	2	2	3	4	4	2	3	4	4	4	4	2	4	4	2	2	2	3	2
2	2	1	4	3	4	5	4	3	2	4	2	4	4	2	5	5	5	1	2	1	4	4	5	2	2	4	2	2	2	3	3	2	4	4	2
2	2	1	2	2	2	3	3	4	2	2	2	2	2	2	2	2	3	4	4	5	4	4	5	2	2	2	4	3	2	2	4	2	5	4	3
1	2	1	4	4	4	3	3	2	4	2	4	4	5	4	3	2	2	4	2	3	4	3	2	2	2	4	2	3	2	4	4	2	4	4	2
2	2	1	5	4	3	2	2	3	5	5	5	3	4	3	5	3	5	3	4	3	3	3	2	5	3	3	4	5	5	5	5	5	3	3	3
1	1	2	3	3	2	3	2	4	4	3	5	2	2	2	5	3	3	2	2	2	4	4	4	2	2	2	3	1	3	4	4	3	2	4	2
2	3	1	3	4	4	1	3	2	1	1	1	4	5	4	3	2	4	2	4	4	2	2	2	2	3	4	4	5	4	2	2	2	2	2	4
1	2	2	2	2	2	4	4	2	3	2	3	4	4	3	4	3	4	2	4	4	4	2	4	2	3	2	4	4	4	2	4	4	4	2	2
1	3	1	3	2	3	4	4	3	5	5	5	5	5	5	3	5	5	5	5	5	2	3	2	5	3	4	3	3	4	4	5	5	5	5	5
2	2	2	2	2	3	3	4	3	4	4	5	2	2	2	4	5	4	2	2	4	4	5	4	2	2	2	4	4	4	2	3	4	3	4	4
2	2	2	5	5	5	5	4	5	4	5	5	5	5	5	5	5	5	5	5	5	5	4	5	4	4	4	5	4	4	4	5	4	4	5	5
1	3	1	4	4	4	2	3	2	2	3	4	2	2	2	4	4	5	2	2	3	2	3	4	2	2	1	4	4	4	1	2	2	4	4	4
1	4	1	3	2	2	2	3	2	4	4	3	3	2	2	3	2	2	5	5	3	2	4	4	4	2	2	3	3	4	2	3	4	4	4	5
2	1	2	4	4	4	3	2	2	2	3	4	4	3	3	2	2	4	3	3	3	4	2	3	2	2	2	4	4	4	2	3	2	3	2	2
1	3	1	3	3	4	4	3	5	3	3	4	5	5	5	5	3	5	3	3	3	5	3	5	5	5	4	5	4	4	3	5	5	5	5	4
1	3	1	2	2	2	2	3	2	2	1	2	2	2	2	2	4	2	4	3	4	2	3	3	2	1	1	4	3	5	3	4	4	4	3	4
1	3	1	2	2	2	2	2	4	2	2	3	3	4	4	4	3	5	4	2	2	1	3	3	4	4	3	1	2	2	4	4	3	2	2	2
1	2	2	4	2	4	4	4	4	4	2	2	1	1	1	3	4	2	4	4	3	3	3	3	4	3	2	2	2	1	3	5	4	2	2	3
1	2	2	3	5	4	5	5	5	5	4	4	3	5	4	5	3	5	3	4	3	5	5	5	3	3	3	4	3	3	3	5	3	5	5	5
2	2	2	2	2	2	3	4	3	4	4	2	4	3	3	2	2	2	5	4	4	2	2	2	3	4	2	2	2	2	2	4	2	2	4	4
1	4	1	4	4	2	2	4	4	3	4	4	3	2	2	2	2	2	4	4	4	3	4	4	2	4	2	2	3	3	2	1	1	4	4	4
1	2	2	2	4	4	2	2	2	2	2	2	4	4	4	4	4	4	2	2	1	4	4	2	5	5	4	2	1	2	4	4	4	4	4	4
1	3	1	2	2	2	3	2	2	4	3	2	3	4	4	4	4	3	4	4	2	2	2	2	3	4	2	3	4	2	2	3	3	2	2	4
2	2	2	3	2	2	2	3	4	4	3	3	2	2	3	5	3	5	4	4	4	3	1	2	4	2	3	3	3	4	3	3	4	3	4	2
2	2	2	3	4	4	1	1	1	3	3	3	4	4	4	3	2	2	4	4	4	2	4	3	2	4	3	4	3	4	2	1	2	2	2	4
2	1	2	3	4	2	2	2	4	1	1	2	3	3	2	4	4	2	2	2	1	3	4	3	3	4	4	4	4	5	4	4	4	3	5	5
2	2	1	5	5	5	5	5	5	5	5	5	5	5	5	5	5	5	5	5	5	5	5	5	5	5	5	5	5	5	5	5	5	5	5	5
1	1	1	2	4	2	3	3	4	2	2	2	2	2	2	3	4	2	4	4	3	2	2	1	4	3	4	3	2	1	2	4	3	5	3	3
2	2	1	3	4	2	4	4	5	1	3	2	4	4	4	2	2	2	4	4	5	5	3	4	3	4	3	3	4	2	2	2	1	2	3	3
2	1	5	5	5	5	5	5	5	5	5	5	5	5	5	5	5	5	5	5	5	5	5	5	5	5	5	5	5	5	5	5	5	5	5	5
2	2	1	4	4	4	2	2	2	2	2	1	5	4	4	2	2	1	3	4	4	4	4	2	3	2	3	3	4	3	2	3	2	3	3	3
2	1	1	2	2	2	1	3	2	2	4	4	2	2	1	4	2	3	4	4	3	3	2	4	2	4	2	4	2	4	2	2	2	4	3	4
2	2	1	2	2	4	2	3	4	3	2	1	5	4	4	2	3	2	2	4	2	5	5	4	1	3	2	2	2	2	2	2	2	4	4	3
1	2	2	5	5	5	5	5	5	5	5	5	5	5	5	5	5	5	5	5	5	5	5	5	5	5	5	5	5	5	5	5	5	5	5	5
2	1	2	2	3	4	4	3	3	3	3	3	4	4	2	1	3	2	3	3	2	2	4	2	2	2	2	2	2	4	2	2	3	4	4	4
1	2	2	3	3	4	1	3	1	4	4	2	2	2	3	3	4	3	4	5	3	2	2	2	5	5	5	4	3	4	4	4	5	2	1	1
1	2	2	3	3	3	3	3	4	5	5	4	2	3	3	5	4	3	5	5	4	5	5	4	3	4	4	5	4	5	3	3	4	3	3	3
1	2	2	2	2	2	4	4	4	4	3	3	3	4	5	2	2	2	4	2	2	2	4	2	4	4	5	4	2	2	2	1	1	4	4	4
1	3	1	4	4	4	2	2	3	3	2	4	2	2	3	2	3	4	4	4	4	3	2	2	4	4	4	2	2	2	4	2	3	3	4	2
1	4	1	5	4	3	5	4	5	3	3	3	3	3	2	5	5	4	5	5	4	5	5	5	3	4	5	5	4	5	5	3	5	3	4	4
1	2	4	4	3	2	4	2	3	2	2	3	2	2	2	2	3	3	2	4	4	3	4	4	4	3	5	2	3	3	2	2	4	5	4	5
2	2	2	4	4	4	3	4	3	4	4	4	2	3	2	2	3	2	2	4	3	2	3	2	2	4	4	3	4	2	2	2	2	2	4	2
2	1	2	5	4	3	4	5	4	3	3	2	4	5	5	5	3	3	5	3	4	2	4	3	5	5	5	4	5	5	4	5	5	5	3	5
2	2	2	4	3	4	2	2	3	4	3	4	2	2	2	2	2	4	4	4	2	2	2	4	4	3	3	2	3	4	2	4	2	2	3	4
1	3	2	4	2	4	4	4	2	3	4	4	4	4	3	4	3	2	2	2	4	5	3	3	4	4	4	4	4	4	4	4	4	3	5	3
1	2	1	2	2	4	4	5	4	5	5	5	4	2	2	4	3	4	2	4	4	4	4	3	4	2	2	2	2	4	2	2	2	1	3	3
2	2	1	2	2	4	2	4	3	2	1	2	4	5	4	4	4	3	3	3	2	2	2	4	2	3	2	2	2	2	2	3	3	5	5	4
2	2	1	5	5	4	3	5	5	3	3	4	4	4	5	5	5	3	5	5	5	4	5	4	5	5	5	3	2	2	3	2	3	5	4	4
1	2	1	3	3	4	5	5	5	3	3	4	4	5	3	5	4	3	3	3	3	5	5	5	5	3	3	5	5	5	5	4	5	4	5	4
1	1	1	2	3	2	4	4	5	3	2	3	4	4	4	2	4	3	2	2	2	2	3	2	4	2	4	4	4	3	3	2	2	2	2	4
1	4	1	2	2	2	2	2	1	4	4	4	4	4	4	4	4	3	1	1	1	2	2	2	3	3	2	4	4	4	2	2	2	2	2	3
2	2	2	2	2	2	2	2	2	3	4	2	2	4	3	2	2	2	4	2	2	2	3	1	2	4	3	2	3	4	4	5	4	2	4	4
1	4	1	2	2	2	3	3	2	2	4	4	4	4	2	3	4	4	2	2	2	2	2	2	4	4	4	3	3	2	4	5	4	5	4	3
1	3	1	3	2	2	4	4	4	1	3	2	2	2	2	3	4	4	2	2	2	2	2	3	4	5	5	3	2	3	4	2	4	1	2	2
2	2	4	4	3	5	4	3	4	2	4	4	2	3	3	2	2	2	2	1	1	1	1	3	1	2	2	4	4	3	3	4	4	5	4	4
1	2	4	4	5	4	3	4	3	2	2	4	2	2	4	3	4	5	2	4	4	4	3	2	5	3	4	4	2	3	2	2	2	2	4	2
2	2	2	3	4	3	4	4	5	3	5	5	5	5	5	4	3	3	3	3	3	3	3	3	5	4	3	3	5	5	3	3	3	5	5	4
1	2	2	3	4	2	5	5	3	3	5	3	5	5	5	5	5	5	5	5	5	5	4	5	3	3	5	5	5	5	5	5	4	5	5	5
2	2	4	4	4	3	4	4	4	4	2	2	2	2	3	2	4	3	2	2	2	2	2	2	2	4	2	4	3	4	4	3	2	3	4	4
2	2	1	4	3	2	2	4	2	4	3	3	3	1	1	2	2	2	2	2	2	2	4	4	4	2	4	4	5	5	3	2	4	2	4	4
2	3	1	3	3	3	3	2	2	2	2	2	2	4	4	2	2	4	1	2	2	1	2	2	3	4	3	4	4	3	2	2	3	3	2	2
1	1	1	5	5	5	5	5	5	5	5	5	5	5	5	5	5	5	5	5	5	5	5	5	5	5	5	5	5	5	5	5	5	5	5	5
1	3	1	5	5	4	5	5	3	4	3	4	3	3	3	5	3	3	5	3	5	4	4	3	3	3	5	5	4	4	5	5	5	5	4	5
1	3	1	4	3	2	1	2	1	2	3	3	2	2	2	2	2	3	3	4	4	2	3	3	2	2	2	4	2	3	2	3	2	4	4	3
2	1	1	4	3	4	2	4	3	4	2	2	4	4	4	4	4	4	4	2	2	2	4	3	4	4	4	3	1	2	4	4	4	4	5	4
1	3	2	4	3	4	3	4	4	2	3	2	4	4	2	2	2	4	2	2	1	4	3	4	2	2	2	4	4	4	1	3	2	4	4	4
2	2	1	4	4	4	2	2	2	4	2	2	4	3	4	2	4	2	4	3	5	4	3	3	2	3	1	2	2	2	3	4	2	2	3	4
2	2	1	2	3	4	3	2	4	1	1	2	3	3	4	2	1	2	4	4	4	4	2	4	3	4	3	4	2	2	1	1	2	3	4	2
2	2	2	2	4	4	2	1	2	4	2	4	3	2	2	2	4	2	3	2	4	2	2	2	3	4	4	2	2	3	3	4	3	3	2	4
1	2	3	2	3	2	4	3	4	3	2	3	4	3	4	3	4	4	5	4	3	3	3	4	5	3	4	3	4	2	4	3	4	5	4	3
1	3	2	4	5	4	4	4	3	5	4	4	5	3	4	4	3	4	5	3	4	4	3	5	3	4	3	4	5	3	5	3	4	4	4	4
2	4	1	3	4	3	4	4	5	3	4	4	3	5	4	3	4	5	3	4	3	4	3	4	4	3	4	3	4	4	4	3	4	3	3	4
2	3	3	3	4	3	4	4	3	5	3	3	4	4	3	3	4	3	4	2	3	3	4	5	4	3	4	3	3	3	4	3	4	3	4	3
2	1	5	3	3	2	4	4	4	4	4	4	3	3	3	3	2	4	4	2	3	3	4	4	3	4	5	3	3	3	5	5	4	5	5	5
2	4	1	3	4	3	3	3	2	3	2	3	4	3	4	3	2	4	3	3	4	3	4	4	3	5	4	3	4	3	4	3	4	3	4	4
2	3	3	3	2	3	3	3	3	5	4	4	4	3	5	3	4	3	4	3	4	3	4	3	4	4	3	4	3	5	4	4	4	4	5	4
1	1	2	4	4	3	4	3	4	3	4	3	4	4	4	5	4	3	4	2	4	3	4	3	4	4	3	4	4	4	3	3	4	5	4	4
2	2	3	2	3	4	3	4	3	4	4	4	3	4	4	3	4	3	4	3	4	4	5	3	4	3	4	3	3	3	3	4	4	3	4	3
2	3	1	3	4	3	5	4	4	3	4	3	4	4	3	3	4	3	4	4	2	3	4	3	4	5	4	3	4	3	4	4	3	3	4	3
2	2	2	3	4	3	4	3	4	5	3	3	4	4	3	3	4	4	4	3	4	3	4	3	4	3	4	3	3	3	4	3	3	3	4	3
2	3	1	3	4	3	4	3	4	3	4	3	4	3	4	3	3	4	4	4	4	3	3	4	4	3	4	5	4	4	4	3	4	3	4	3
2	2	2	3	4	3	4	3	4	4	4	3	3	4	4	4	2	3	4	4	4	4	3	4	4	4	4	3	4	4	4	4	3	4	4	5
1	3	1	3	4	4	3	4	4	3	4	3	3	4	4	4	3	4	2	4	4	3	5	4	5	3	4	3	4	3	4	4	4	3	4	4
2	3	2	3	4	3	4	3	4	4	4	3	4	4	3	3	4	4	3	4	3	3	4	2	4	4	4	3	3	4	5	4	4	3	4	5
2	3	2	3	4	3	4	4	4	3	4	4	2	3	4	4	4	3	4	5	4	4	4	3	4	3	4	3	4	4	4	3	4	4	4	3
2	2	3	3	4	3	4	4	4	4	3	4	4	3	3	4	4	3	4	4	4	3	4	5	3	3	4	4	3	3	4	4	3	3	4	3
2	2	3	3	4	3	3	4	4	3	4	3	4	3	4	3	3	3	4	3	3	3	4	4	4	3	4	3	3	3	4	3	4	3	4	4
1	3	2	3	4	3	4	3	4	4	4	3	3	4	3	3	4	3	4	3	4	3	3	4	3	3	4	3	3	4	4	3	4	4	3	4
2	2	1	3	4	3	4	3	4	3	3	3	4	3	4	4	4	4	3	4	4	4	3	4	4	3	4	3	4	3	4	3	3	4	4	5
1	4	1	3	4	3	4	5	4	4	4	3	4	3	4	3	4	4	4	3	4	3	4	4	3	4	5	4	3	4	3	4	4	3	4	4
2	3	2	3	4	3	5	4	4	3	4	3	4	3	4	3	3	4	3	4	3	3	4	4	4	3	4	4	3	4	4	5	3	3	4	4
2	2	2	4	4	3	3	3	3	4	4	3	4	3	3	4	4	4	3	3	3	4	3	4	3	4	4	4	4	3	4	4	3	4	4	3
2	1	1	3	5	4	5	5	5	4	3	4	5	3	5	5	4	3	5	5	4	5	5	5	4	4	3	4	4	3	5	4	5	4	5	4
1	3	3	3	5	4	5	4	5	3	4	3	5	4	3	3	5	4	3	4	5	3	4	3	5	3	4	3	5	2	5	4	3	3	5	3
1	3	2	3	4	2	4	2	4	3	4	3	5	3	4	2	4	3	4	3	4	3	4	2	3	2	3	3	4	2	4	3	4	3	4	4
2	3	3	3	4	3	5	3	5	5	4	3	4	5	3	3	4	3	5	4	5	3	5	4	4	4	5	3	4	4	5	5	4	3	4	4
2	3	3	3	4	5	4	3	4	5	2	4	5	4	5	5	5	4	3	3	2	5	4	5	5	4	5	4	3	3	4	5	3	4	5	5
1	3	2	3	3	2	4	2	4	3	4	3	3	4	3	3	4	3	5	3	3	3	4	3	4	3	4	3	4	3	5	3	4	3	3	4
1	1	1	5	5	5	5	5	5	5	5	5	5	5	5	5	5	5	5	5	5	5	5	5	5	5	5	5	5	5	5	5	5	5	5	5
1	1	1	5	3	4	3	4	4	4	4	4	4	4	2	2	4	3	4	3	3	5	5	3	4	4	3	3	4	2	3	3	2	3	3	3
2	4	5	2	4	3	3	4	4	3	3	4	4	4	4	4	4	4	4	4	4	4	4	4	4	4	4	4	4	4	4	4	4	4	4	4
1	1	1	5	5	5	5	5	5	5	5	5	5	5	5	5	5	5	5	5	5	5	5	5	5	5	5	5	5	5	5	5	5	5	5	5
2	1	1	2	2	3	3	3	4	4	4	4	4	4	4	4	4	4	4	4	4	4	4	4	4	4	4	4	4	4	4	4	4	4	4	4
2	3	1	3	3	3	3	3	3	3	3	3	3	3	3	3	3	3	3	3	3	3	3	3	3	3	3	3	3	3	3	3	3	3	3	3
2	3	2	4	4	3	4	3	4	4	3	3	4	4	3	4	3	4	4	3	5	5	3	4	5	3	4	5	5	5	3	4	5	5	3	4
2	1	3	3	3	3	3	3	3	3	3	3	3	3	3	3	3	3	3	3	3	3	3	3	3	3	3	3	3	3	3	3	3	3	3	3
1	3	1	5	4	4	5	5	5	4	4	4	5	5	4	5	5	5	4	5	4	4	5	4	4	5	5	5	4	4	5	4	5	5	5	4
1	3	2	4	5	4	4	4	4	4	5	5	5	4	5	5	4	4	5	5	5	4	5	4	4	5	5	5	5	4	5	5	4	4	5	5
2	3	1	4	4	5	4	4	5	5	4	4	4	4	5	5	4	4	4	5	4	4	5	5	5	5	4	4	4	4	4	5	5	5	5	5
2	3	2	4	4	5	4	5	5	4	5	5	4	5	5	4	5	5	5	5	5	5	4	5	4	4	5	5	5	5	4	4	5	5	5	5
2	3	1	5	4	4	5	5	4	5	5	5	4	5	4	5	5	5	4	4	5	5	4	5	5	5	4	5	5	5	4	5	5	5	5	5
1	1	2	3	3	3	3	3	3	3	3	3	3	3	3	3	3	3	3	3	3	3	3	3	3	3	3	3	3	3	3	3	3	3	3	3
1	1	1	5	5	5	5	5	5	5	5	5	5	5	5	5	5	5	5	5	5	5	5	5	5	5	5	5	5	5	5	5	5	5	5	5
1	3	1	5	4	4	5	5	4	5	4	5	5	4	4	5	5	3	4	4	5	5	4	4	5	5	4	4	5	5	4	4	5	5	4	5
1	2	2	5	4	4	5	5	4	5	5	4	3	4	3	4	3	3	4	3	3	4	3	3	3	4	4	4	5	4	5	4	3	4	5	3
1	3	1	3	3	3	3	3	3	4	3	3	4	3	3	3	4	3	3	3	4	3	3	4	4	4	4	3	3	3	4	4	4	3	3	4
1	4	1	4	5	3	5	5	4	4	5	4	4	3	5	4	3	3	5	4	4	5	4	4	5	4	3	5	4	4	5	3	3	5	4	5
2	1	3	5	5	4	5	5	5	5	5	5	4	4	3	5	5	5	5	4	4	5	4	4	4	5	5	5	5	4	5	4	5	4	5	4
1	2	5	4	3	4	4	5	3	4	4	3	4	3	4	3	3	5	4	3	3	4	4	3	4	5	4	5	5	5	5	4	4	5	4	4
1	3	1	4	4	2	5	4	4	3	5	5	4	4	5	5	3	4	5	4	4	5	4	3	4	5	5	5	5	5	4	3	4	5	3	4
1	3	3	4	5	5	4	4	4	5	5	5	4	5	5	5	4	5	4	4	5	5	5	4	4	5	5	4	5	5	4	5	4	5	5	5
1	3	1	5	4	5	5	5	4	3	4	5	4	5	5	5	4	5	5	5	5	5	4	4	5	5	4	4	5	5	5	5	5	5	5	4
2	3	1	4	5	5	4	4	4	5	5	5	4	5	5	5	4	5	5	5	5	4	5	5	4	4	4	5	5	5	4	5	5	5	4	5
1	2	3	4	5	4	4	5	5	5	4	4	4	5	5	5	4	4	5	5	4	5	4	4	5	5	5	4	4	5	4	4	5	5	4	5
2	3	1	4	5	4	5	5	5	5	4	4	5	5	4	4	5	5	4	4	5	5	5	5	4	4	5	5	5	5	4	4	5	5	5	5
2	3	2	5	4	5	4	5	5	5	4	4	5	5	4	4	5	5	5	5	5	4	5	5	5	5	4	5	4	4	4	5	5	4	5	4
2	1	5	4	4	3	4	4	3	4	4	4	4	4	3	4	3	4	4	2	3	4	4	3	4	4	4	3	4	4	3	4	4	4	3	4
1	1	2	4	5	3	5	5	5	4	3	3	5	3	3	3	4	5	4	4	3	5	3	4	3	4	3	3	5	3	3	5	4	3	4	4
2	3	3	2	3	2	5	3	4	4	3	3	3	3	3	3	4	3	4	3	4	4	3	4	3	3	3	3	3	3	4	3	3	4	3	4
1	2	2	3	3	4	4	3	5	4	4	3	3	4	4	3	3	3	4	5	3	5	3	4	4	3	4	3	4	3	4	4	3	3	4	5
1	3	2	5	4	4	5	5	4	4	5	5	4	4	5	5	5	4	4	3	5	5	4	4	5	5	4	5	5	5	4	5	5	4	5	4
2	3	4	4	4	4	4	4	4	4	4	4	4	4	4	4	4	4	4	4	4	4	4	4	4	4	4	4	4	4	4	4	4	4	4	4
2	1	2	3	3	4	4	5	3	5	4	3	4	4	3	3	3	3	3	4	4	3	3	4	3	3	4	3	4	3	4	3	4	4	4	3
1	4	1	5	4	4	5	5	5	4	5	5	4	3	5	5	4	5	4	5	4	5	5	5	4	5	5	4	5	5	4	4	5	5	4	5
2	3	1	5	4	5	5	4	5	4	5	4	5	4	5	5	5	5	4	5	4	4	5	5	5	5	4	4	4	5	4	5	4	5	5	4
1	1	2	3	2	3	3	3	3	3	4	3	4	3	3	3	3	3	3	3	4	3	3	4	4	3	2	3	3	3	4	3	3	3	3	4
2	2	3	4	4	3	4	4	4	4	5	4	4	4	3	4	4	5	3	4	4	5	5	5	5	4	4	4	4	4	2	5	4	3	4	4
2	4	1	5	4	5	4	4	5	5	4	4	5	5	4	5	4	4	5	4	4	5	4	5	5	5	4	5	5	5	4	5	5	5	4	5
1	3	2	5	4	5	5	4	5	4	5	5	4	5	4	4	5	5	4	4	5	5	5	4	5	5	4	5	5	5	4	4	5	5	5	5
2	2	2	3	4	3	4	3	5	4	4	4	3	5	4	4	4	5	4	3	4	4	5	4	4	4	3	5	5	4	5	4	5	4	4	4
2	3	1	5	4	4	5	5	5	4	5	5	4	5	4	5	5	5	4	5	5	5	4	5	4	5	5	5	4	5	4	5	5	5	4	5
2	1	5	3	4	3	3	4	4	3	5	5	5	3	3	5	5	4	5	5	4	4	4	3	4	4	5	3	4	5	4	5	5	4	3	4
1	3	3	5	5	5	4	4	5	4	3	4	5	3	4	5	5	4	5	4	4	4	3	4	5	5	3	4	5	5	3	4	4	5	4	5
1	2	3	4	5	3	4	4	3	3	4	5	5	4	3	5	3	4	5	4	4	4	3	5	4	5	5	4	4	5	3	4	5	5	3	4
2	1	5	5	3	4	4	4	3	4	5	5	4	3	4	4	5	4	3	4	4	5	4	4	3	5	4	5	3	5	3	4	4	5	4	4
2	3	2	3	5	4	4	4	3	5	4	5	4	3	4	5	5	4	5	4	4	5	3	4	5	5	3	4	3	5	3	4	3	5	3	4
2	2	3	4	5	4	4	5	5	5	4	4	4	3	5	4	2	3	4	4	4	4	5	4	5	4	5	4	3	4	4	5	5	4	5	5
1	3	1	4	3	1	3	3	3	3	3	3	3	3	3	3	3	3	2	2	2	4	3	4	3	5	5	5	5	5	5	5	5	5	4	3
1	4	1	4	4	3	4	4	4	3	4	4	4	3	3	4	3	4	4	4	4	5	5	4	5	5	4	4	3	4	5	5	4	5	4	4
2	4	1	4	3	3	5	5	5	4	5	5	4	4	3	3	4	4	4	3	3	4	4	3	5	5	3	4	5	4	4	4	3	5	4	4
1	3	1	4	5	3	5	3	4	4	4	5	4	3	3	4	3	4	4	4	4	5	4	4	5	5	3	4	4	3	5	4	4	5	4	4
2	3	3	4	5	3	5	5	4	5	5	5	4	4	3	5	4	4	5	3	4	5	3	3	4	5	4	3	4	5	3	4	5	5	3	4
2	2	2	5	3	2	4	5	3	4	3	5	3	4	3	5	2	3	3	3	4	5	5	5	5	5	4	4	5	5	4	4	5	5	5	5
2	1	2	5	4	4	4	4	3	4	3	3	4	3	4	5	3	4	4	5	3	3	4	5	4	4	5	3	5	5	4	4	5	5	5	5
1	2	3	3	5	4	5	2	4	3	4	3	3	4	3	3	3	3	3	3	3	4	3	3	4	4	3	3	4	3	3	3	3	4	3	4
2	2	1	4	5	3	4	5	5	4	5	5	3	4	3	3	3	2	3	1	4	5	5	5	5	5	5	4	5	5	5	4	5	5	5	5
2	1	2	3	3	3	3	3	3	3	3	3	3	3	3	3	3	3	3	3	3	3	3	3	3	3	3	3	3	3	3	3	3	3	3	3
1	2	5	5	4	2	4	5	5	3	4	5	4	3	2	4	4	3	4	3	3	4	5	3	4	5	5	4	4	4	4	5	5	4	5	5
1	4	1	2	3	1	3	3	1	2	3	2	3	3	1	3	3	2	3	1	2	5	4	3	5	5	4	3	3	4	4	4	3	5	5	5
2	3	3	4	2	1	1	4	1	2	3	4	3	3	2	1	2	2	3	2	1	4	2	3	2	4	3	4	2	4	4	5	4	5	5	3
1	3	4	5	3	2	4	4	2	3	4	5	2	4	3	5	2	3	4	3	4	5	3	4	3	5	2	4	3	5	3	4	2	5	5	5
2	3	2	4	5	3	4	4	5	5	4	5	5	4	3	4	3	4	4	4	4	5	4	5	5	5	3	5	4	3	5	5	5	4	4	4
1	1	2	4	3	5	3	4	5	4	4	5	4	3	4	3	4	4	3	4	4	4	3	4	3	5	4	5	5	4	5	4	5	5	4	4
2	3	3	4	4	5	4	5	5	5	5	5	4	4	4	5	4	5	4	4	5	5	5	5	5	5	4	5	4	5	3	4	5	5	4	5
1	4	2	5	4	5	4	4	4	4	4	4	5	5	4	4	5	4	4	4	5	5	4	3	4	3	4	5	4	5	4	4	5	4	4	4
2	2	5	4	5	4	5	4	5	5	4	4	5	5	5	5	4	4	5	4	5	5	4	4	4	4	5	4	4	4	5	4	4	5	4	5
2	3	3	4	4	3	4	5	4	3	4	3	4	5	4	4	5	5	4	4	5	5	4	4	5	4	3	4	4	4	5	4	4	4	5	4
1	1	2	3	2	3	3	2	3	2	3	3	2	3	2	3	2	3	2	3	2	3	2	3	2	3	2	3	2	3	2	3	2	3	2	3
1	1	1	3	2	3	2	3	4	3	4	3	4	3	4	3	4	3	4	3	4	3	4	3	4	3	4	3	4	3	4	3	4	3	4	3
1	2	1	3	4	3	4	3	4	3	4	3	4	3	4	3	4	3	4	3	4	3	4	3	4	3	4	3	4	3	4	3	4	3	4	3
1	3	1	3	4	3	4	3	4	3	4	3	4	3	4	3	4	3	4	3	4	3	4	3	4	3	4	3	4	3	4	3	4	3	4	3
2	2	3	3	4	3	4	3	4	3	4	3	4	3	4	3	4	3	4	3	4	3	4	3	4	3	4	3	4	3	4	3	4	3	4	3
2	2	2	3	4	3	4	3	4	3	4	3	4	3	4	3	4	3	4	3	4	3	4	3	4	3	4	3	4	3	4	3	4	3	4	3
1	3	3	3	4	3	4	3	4	3	4	3	4	3	4	3	4	3	4	3	4	3	4	3	4	3	4	3	4	3	4	3	4	3	4	3
1	2	2	3	4	3	4	3	4	3	4	3	4	3	4	3	4	3	4	3	4	3	4	3	4	3	4	3	4	3	4	3	4	3	4	3
1	4	1	4	5	3	5	4	4	3	4	4	3	4	4	4	3	4	4	3	3	4	5	4	5	5	4	4	5	5	4	5	4	5	4	4
1	2	2	3	4	3	4	3	4	3	4	3	4	3	4	3	4	3	4	3	4	3	4	3	4	3	4	3	4	3	4	3	4	3	4	3
2	1	2	3	4	3	4	3	4	3	4	3	4	3	4	3	4	3	4	3	4	3	4	3	4	3	4	3	4	3	4	3	4	3	4	3
1	2	2	3	4	3	4	3	4	3	4	3	4	3	4	3	4	3	4	3	4	3	4	3	4	3	4	3	4	3	4	3	4	3	4	3
2	3	1	4	5	3	4	3	4	4	3	4	4	4	2	4	2	4	4	4	3	5	5	4	5	5	4	5	5	5	4	5	4	5	5	4
1	3	3	3	4	3	4	3	4	3	4	3	4	3	4	3	4	3	4	3	4	3	4	3	4	3	4	3	4	3	4	3	4	3	4	3
1	3	3	3	4	3	4	3	4	3	4	3	4	3	4	3	4	3	4	3	4	3	4	3	4	3	4	3	4	3	4	3	4	3	4	3
2	1	1	3	4	3	4	3	4	3	4	3	4	3	4	3	4	3	4	3	4	3	4	3	4	3	4	3	4	3	4	3	4	3	4	3
1	3	3	3	4	3	4	3	4	3	4	3	4	3	4	3	4	3	4	3	4	3	4	3	4	3	4	3	4	3	4	3	4	3	4	3
1	3	1	4	4	3	4	3	3	4	3	3	4	4	3	3	3	4	4	3	3	4	4	3	4	5	4	3	4	3	4	3	4	3	4	3
2	2	3	3	4	3	4	3	4	3	4	3	4	3	4	3	4	3	4	3	4	3	4	3	4	3	4	3	4	3	4	3	4	3	4	3
2	2	3	4	3	4	3	4	3	5	3	4	5	3	3	4	2	4	3	5	4	5	4	4	5	5	4	5	5	4	5	4	4	4	5	5
2	2	1	5	4	4	5	3	4	5	4	4	5	4	4	5	3	4	3	3	4	5	4	5	4	4	5	5	4	4	5	4	4	4	5	5
1	1	5	5	4	4	4	4	5	5	4	4	5	5	4	4	2	4	5	3	4	5	4	4	5	4	5	3	4	5	4	3	4	5	4	5
2	1	2	5	5	4	4	4	5	4	4	4	5	4	4	4	3	4	5	4	4	5	4	5	5	4	5	5	4	4	3	4	5	4	5	4
1	3	3	4	4	3	5	4	3	5	4	4	5	5	4	5	3	4	4	5	4	5	4	5	4	5	4	4	4	4	4	5	5	5	4	5
2	1	2	4	5	4	4	5	4	5	4	5	4	4	5	5	4	5	5	3	4	5	3	4	4	4	5	4	5	4	3	4	5	5	4	4
1	2	2	4	4	4	5	4	5	4	4	4	5	4	4	5	4	4	5	4	4	5	4	5	3	4	5	5	4	4	5	4	4	4	5	4
2	2	2	4	5	2	4	4	5	4	4	4	5	4	5	4	5	4	4	4	5	4	5	5	4	4	5	4	5	4	5	4	4	4	5	5
2	2	2	3	4	4	3	3	4	4	3	5	4	3	3	4	4	5	5	4	3	4	3	3	4	3	4	4	3	3	4	5	3	3	4	3
2	3	1	5	4	1	3	4	3	5	4	4	4	5	4	4	3	4	5	4	4	4	5	5	4	5	5	4	4	5	3	3	4	5	5	5
1	2	2	4	5	3	4	4	5	5	3	4	5	4	3	4	5	4	5	4	4	3	5	4	5	5	5	3	4	5	4	3	5	4	5	4
1	3	2	3	4	4	5	3	4	3	4	4	5	5	5	3	4	4	2	2	4	3	3	4	5	5	5	4	5	4	5	4	4	3	4	5
1	1	5	4	3	4	3	3	4	5	4	3	4	3	4	4	3	4	3	4	3	4	3	5	3	3	4	3	3	3	3	4	3	4	3	3
2	4	3	4	5	4	5	4	5	4	5	4	4	5	5	4	4	5	4	3	4	4	5	5	4	5	4	3	5	4	5	4	4	4	4	5
1	3	2	3	4	4	3	4	5	4	5	5	5	4	3	4	5	3	3	4	2	3	4	5	4	3	4	4	4	3	4	5	3	3	4	4
2	2	3	4	4	5	4	4	5	4	4	4	5	4	5	5	4	4	5	4	3	4	5	5	4	5	5	4	3	4	5	4	5	4	4	5
2	3	3	5	4	3	4	5	4	4	3	4	5	4	4	4	5	4	4	5	4	4	5	5	4	4	5	4	5	4	3	5	4	4	5	4
2	4	1	4	5	2	3	4	5	4	4	4	5	4	5	5	4	4	3	4	4	4	5	5	5	5	5	3	4	5	5	3	4	4	5	5
1	3	1	3	4	3	4	5	5	4	3	3	4	5	4	3	4	5	4	3	4	3	4	5	5	3	4	3	3	4	4	5	4	5	5	4
2	1	1	3	4	4	5	5	5	4	5	4	5	3	4	3	3	4	3	4	3	4	5	3	4	3	4	5	4	3	4	5	4	4	4	4
1	2	2	4	5	3	4	5	4	4	5	4	5	5	4	4	4	5	3	4	5	4	3	5	4	4	5	5	4	4	3	3	5	4	5	5
1	2	3	3	4	5	4	3	4	3	4	3	5	3	4	3	4	4	4	5	5	5	5	4	5	4	5	3	4	4	5	5	4	4	5	4
1	2	3	5	4	4	5	4	5	5	5	4	5	3	5	4	3	4	5	4	5	4	5	4	5	5	4	4	5	4	5	4	4	4	4	5
1	3	3	2	2	1	2	3	2	1	3	3	1	2	2	3	2	4	2	3	3	4	2	3	3	3	2	1	3	3	3	2	3	3	2	3
1	2	1	4	5	5	5	4	5	5	4	4	4	2	2	3	4	3	3	1	5	3	4	2	3	2	5	2	2	2	4	4	3	5	5	5
1	4	3	5	4	3	4	4	3	5	4	5	4	4	2	3	5	4	2	4	3	4	5	4	5	5	5	4	4	3	3	4	4	2	4	2
2	1	2	2	5	1	5	3	4	4	4	2	4	3	4	4	4	5	3	2	5	4	3	4	5	4	3	4	4	2	4	3	3	4	3	2
1	1	1	4	3	3	3	4	5	3	3	2	5	3	4	5	4	4	5	4	3	4	4	5	5	2	3	4	3	5	3	4	4	4	5	2
1	2	2	3	5	4	3	3	5	2	1	5	4	4	4	4	4	1	4	4	4	4	5	4	5	4	4	4	4	3	2	3	3	5	4	4
2	3	1	2	4	5	5	3	3	2	4	2	2	4	4	3	4	3	2	3	4	4	5	3	4	3	3	3	4	2	3	5	4	5	4	5
1	3	1	4	4	3	4	2	2	3	4	5	4	2	3	3	4	3	5	4	4	4	3	2	3	5	3	3	5	5	4	5	3	5	2	3
1	4	2	2	4	5	4	4	3	3	4	5	5	2	4	3	2	4	4	2	3	5	4	4	4	3	4	3	5	4	2	4	4	3	2	5
1	1	2	2	5	2	5	4	3	2	4	4	5	4	4	2	5	2	2	5	3	4	4	4	3	2	3	4	4	4	4	4	2	4	3	2
2	2	2	3	2	3	3	5	4	3	3	3	2	4	2	4	4	4	3	2	4	3	2	3	4	3	2	3	1	3	5	4	1	4	5	5
1	1	3	3	4	2	4	4	4	5	3	4	5	5	2	3	4	4	4	4	2	3	2	3	2	4	3	3	4	4	5	2	5	5	3	2
2	2	1	3	2	3	4	5	2	4	3	5	5	3	3	4	1	4	4	4	3	4	3	4	3	4	3	4	3	3	4	4	4	5	4	5
2	2	1	4	5	3	5	4	2	4	2	3	5	3	4	2	2	4	5	1	4	4	2	2	4	4	4	5	2	4	2	3	2	2	5	3
2	3	3	4	1	4	3	4	4	2	2	2	5	3	2	3	4	4	4	4	4	4	4	4	4	4	2	2	3	2	5	2	4	4	2	2
1	2	3	5	4	4	2	4	4	3	3	3	2	3	4	2	4	4	4	2	5	3	5	3	4	3	4	4	5	3	4	3	5	2	5	4
2	2	1	5	5	4	4	5	4	3	1	5	2	3	4	4	2	5	5	3	3	4	1	4	4	5	1	4	2	3	5	4	4	5	4	3
2	3	2	5	4	2	2	4	3	4	3	4	4	3	3	3	4	4	4	4	2	3	5	3	3	3	2	3	5	3	5	4	2	3	2	3
1	1	2	5	4	2	3	3	5	3	5	2	3	5	4	2	3	3	3	5	5	3	2	2	3	3	4	3	5	4	4	2	4	4	4	5
1	3	3	4	3	2	2	5	4	2	4	2	2	3	2	5	2	3	5	1	3	4	3	5	2	3	3	3	4	3	3	4	4	5	5	4
2	2	1	4	5	3	3	5	5	4	4	2	2	3	2	4	5	5	5	4	4	5	5	3	2	4	5	4	3	4	5	5	4	5	4	3
2	3	1	3	4	4	4	5	3	4	4	3	3	3	1	2	2	2	2	5	1	4	5	3	5	5	3	5	4	3	2	4	2	3	4	3
1	3	2	5	1	3	3	4	5	2	2	2	4	5	5	3	4	4	5	2	5	4	2	3	4	3	5	4	3	3	4	2	2	4	4	4
2	2	1	2	4	2	2	2	4	4	4	4	4	5	4	3	2	5	3	4	2	2	4	4	2	5	2	2	5	4	4	3	3	4	4	4
1	2	5	2	5	3	4	4	4	2	1	3	3	3	5	4	5	4	5	4	5	5	4	2	5	5	4	4	5	3	2	5	3	3	4	4
1	4	1	2	3	5	3	4	3	3	3	3	5	3	4	2	2	3	3	2	4	5	2	2	4	2	5	1	4	5	3	4	2	2	4	3
1	2	1	3	4	4	2	2	3	5	5	4	4	2	4	3	4	4	3	3	4	5	4	4	5	4	4	5	4	2	3	4	4	2	4	5
1	1	2	4	3	5	4	3	2	3	4	3	4	5	4	3	2	2	5	4	1	3	2	3	4	4	5	2	4	2	5	4	4	4	2	5
2	2	1	4	5	4	2	4	4	3	2	5	5	4	5	3	2	5	4	5	5	3	5	4	3	5	5	5	4	4	3	2	5	4	3	4
1	3	2	4	5	3	4	4	4	4	2	4	4	5	3	2	2	4	4	5	4	2	3	3	4	4	4	4	5	5	3	1	4	5	3	3
2	4	2	4	4	4	5	2	3	3	4	4	3	5	4	4	5	3	4	2	4	4	4	4	4	5	1	4	2	2	4	2	4	5	5	4
1	2	1	5	3	4	3	3	4	2	3	2	4	3	5	4	2	3	4	5	2	4	2	5	3	4	4	2	5	1	4	3	1	3	3	1
1	2	4	4	4	2	4	4	4	4	4	4	4	5	5	4	2	4	4	4	3	5	5	4	4	4	3	3	5	2	3	4	4	4	5	4
2	3	1	4	2	3	2	2	2	4	2	2	2	3	5	4	2	4	3	3	4	3	4	2	5	4	5	1	2	2	4	2	3	3	3	2
2	3	3	2	4	4	4	3	2	3	4	3	4	3	3	2	2	2	5	3	4	3	2	5	4	3	4	5	4	5	4	3	4	2	3	4
1	2	3	4	4	4	4	4	3	4	4	3	4	5	4	2	5	4	1	5	3	3	1	3	3	3	5	2	4	3	3	5	3	3	4	3
2	2	2	2	4	2	2	5	3	4	4	2	3	4	4	3	4	4	2	4	5	5	3	5	4	2	4	4	5	3	3	5	4	2	4	3
1	4	3	5	3	4	5	5	4	4	5	2	1	3	3	3	2	1	3	4	4	3	4	3	4	4	4	5	4	5	4	5	5	4	4	5
2	3	1	3	2	2	3	2	2	3	5	4	3	3	3	4	5	4	3	2	5	5	5	2	3	4	5	5	5	5	3	4	5	4	5	4
2	1	4	4	5	2	2	4	4	3	2	4	4	2	4	4	4	5	4	5	4	3	1	5	1	4	4	5	5	3	3	5	4	5	4	4
2	2	3	3	3	2	4	2	2	3	4	4	5	1	2	3	4	5	3	4	5	5	4	5	4	5	4	2	4	4	4	3	4	5	2	5
1	3	4	3	1	3	4	3	5	3	4	4	4	2	4	2	5	2	3	3	5	4	3	2	5	1	4	3	4	5	2	3	5	2	4	5
2	1	3	3	4	4	4	5	4	5	3	2	4	3	2	5	3	4	4	4	4	4	3	4	4	4	4	3	3	2	4	2	4	4	5	4
1	2	1	2	4	4	5	5	5	4	4	2	2	4	4	5	5	4	4	4	4	1	2	2	5	4	4	3	3	4	4	3	4	4	5	3
2	3	1	4	4	3	2	2	3	4	5	4	3	4	4	3	3	2	1	4	4	2	3	4	5	2	5	3	4	5	4	4	4	5	2	3
1	3	3	2	3	4	3	4	4	4	3	3	2	4	2	4	2	4	1	2	2	4	3	3	5	3	4	4	3	3	5	2	4	3	3	3
2	2	2	4	4	2	4	5	4	2	4	3	3	3	4	3	2	3	4	3	4	2	2	2	2	3	3	3	3	5	5	3	5	2	5	4
2	1	2	3	4	2	1	2	4	3	4	4	3	2	4	5	4	4	4	3	5	3	1	4	4	4	4	4	5	5	2	4	4	5	2	3
1	2	2	3	5	2	4	4	5	5	3	2	4	5	4	5	5	3	5	5	4	2	5	4	2	4	4	3	5	4	3	4	5	5	4	4
2	4	1	2	2	3	4	4	4	2	3	4	3	4	2	2	5	4	4	2	4	5	2	3	2	4	5	3	5	5	3	4	4	3	3	5
2	2	2	3	3	3	3	2	2	4	5	5	4	3	5	2	2	5	5	1	5	5	4	4	3	3	4	4	4	4	4	4	3	4	4	2
2	2	3	5	3	3	4	3	5	2	3	5	4	3	4	4	4	1	4	4	4	2	2	3	2	4	2	5	5	1	4	5	3	3	3	2
2	3	1	3	5	3	2	5	2	5	3	2	5	1	4	2	4	4	2	4	2	5	1	4	3	2	3	4	5	3	2	3	1	4	2	5
2	2	2	4	4	4	3	2	3	4	3	5	4	5	4	4	4	5	4	3	4	5	5	3	4	5	4	5	2	3	4	4	5	2	4	5
1	3	2	3	4	2	3	4	2	5	4	4	5	3	4	3	2	5	5	3	2	5	5	3	4	4	4	5	5	5	4	4	5	3	5	4
2	1	3	2	5	4	2	3	3	3	4	4	5	4	3	4	4	4	1	4	5	4	5	4	3	4	1	4	4	4	2	2	4	4	4	2
1	2	2	4	5	4	2	3	3	4	3	5	4	4	4	5	2	4	5	3	4	2	5	5	3	2	4	5	3	4	5	5	4	3	4	2
1	1	2	5	2	3	3	1	5	4	4	4	3	5	3	4	4	2	3	3	4	5	3	5	5	2	2	4	3	3	2	3	4	5	2	3
1	3	1	3	4	2	5	5	4	4	4	2	3	4	5	5	2	3	3	3	3	5	4	2	2	5	5	2	5	3	4	3	3	3	4	3
1	2	4	5	4	5	3	2	4	3	3	3	5	3	1	2	2	5	5	2	4	5	5	5	3	4	2	3	4	4	3	5	4	4	5	2
2	2	1	4	1	3	3	4	5	4	4	2	5	3	3	5	4	2	4	2	4	3	4	3	4	3	3	5	4	4	5	3	3	3	5	3
1	2	1	2	3	4	3	4	3	2	2	4	5	5	3	4	3	4	3	5	4	2	4	4	4	5	4	2	2	5	3	2	5	4	2	5
1	1	3	5	5	3	2	5	3	3	2	3	2	3	2	4	4	3	5	4	2	2	2	2	3	4	4	4	2	2	3	2	4	5	4	3
2	4	3	4	4	3	4	3	3	3	4	3	5	2	4	5	2	4	5	5	5	2	4	5	3	4	5	5	4	3	4	4	2	5	5	5
1	3	3	4	4	4	2	5	2	4	3	2	4	4	4	4	4	2	5	5	1	3	5	4	4	4	4	2	3	5	4	3	1	4	5	5
2	2	2	3	4	4	5	4	2	2	3	5	4	3	4	5	4	3	1	5	4	5	5	3	3	4	5	2	4	5	4	3	3	2	4	2
2	2	3	4	4	4	3	5	4	5	3	3	2	3	2	4	5	5	5	4	4	2	4	3	3	2	4	4	4	3	4	2	2	4	4	4
1	2	1	2	2	3	3	4	4	3	3	3	3	4	3	3	5	4	3	3	5	4	5	3	2	4	2	5	5	5	4	3	3	2	4	5
1	2	1	5	3	5	4	2	4	4	3	4	5	4	5	2	2	4	5	5	4	4	3	3	4	5	2	4	3	2	5	3	3	5	4	5
2	4	3	3	4	2	4	5	2	4	4	2	5	2	5	3	4	4	5	3	5	5	5	4	4	3	4	5	4	2	5	3	2	5	2	4
1	3	2	5	2	3	3	4	4	2	5	3	5	5	4	5	3	2	3	2	5	2	3	4	5	5	3	3	4	3	4	2	3	4	4	4
1	2	2	2	3	3	3	5	4	4	4	2	5	4	2	4	2	4	2	5	3	5	2	4	4	4	3	4	5	4	3	3	3	3	4	3
1	3	1	3	5	3	4	4	1	3	4	3	4	3	5	4	2	5	4	3	2	2	4	4	3	2	4	1	2	3	3	2	4	2	5	4
2	4	1	2	4	3	3	3	4	3	1	5	2	3	2	2	4	3	3	1	3	3	3	2	3	3	5	2	1	3	3	4	5	3	4	5
2	3	1	3	4	4	3	3	3	2	5	5	2	3	3	5	4	5	4	5	5	3	4	4	4	5	3	5	5	2	4	2	2	5	5	4
2	2	1	4	4	5	3	5	2	3	2	3	3	5	5	4	2	5	5	5	3	3	4	2	4	4	5	2	3	2	4	5	4	5	2	3
2	2	2	5	4	4	4	3	4	3	4	4	5	5	4	2	4	4	4	5	4	3	2	3	2	5	2	3	4	3	3	2	4	2	5	2
1	2	2	5	4	4	3	5	3	5	5	5	2	4	5	5	2	3	5	2	5	3	4	4	5	5	5	3	4	2	3	5	2	4	5	3
2	3	2	4	3	5	3	3	1	3	5	3	5	5	3	3	5	5	5	4	4	5	3	3	5	5	4	3	3	3	2	3	3	4	4	3
2	2	2	3	4	4	4	3	1	3	4	4	5	5	2	3	3	2	4	3	5	5	3	4	5	2	4	1	4	2	4	3	4	2	4	2
2	3	1	3	3	3	4	5	1	4	4	5	2	4	4	2	5	4	3	4	3	3	3	4	5	1	2	3	4	4	2	5	4	2	4	1
2	2	2	3	5	4	2	5	2	3	5	4	5	3	2	3	4	4	3	3	4	2	2	2	4	5	4	4	5	4	3	2	5	3	1	4
1	2	4	4	4	3	5	2	4	4	5	2	4	3	3	4	3	3	5	4	4	5	4	4	4	4	5	3	4	4	4	5	4	4	4	3
1	1	1	5	1	2	5	3	3	2	3	3	5	3	3	3	5	3	4	3	3	3	5	5	2	5	5	2	4	2	3	2	5	2	2	5
2	3	1	3	2	4	5	4	5	3	2	4	5	4	4	5	3	5	5	4	5	4	2	5	2	5	5	4	4	1	2	3	4	3	2	4
2	2	1	5	4	3	5	5	5	3	3	2	5	2	5	3	4	3	4	2	2	2	5	3	5	5	4	5	4	3	3	4	5	2	3	3
1	4	1	3	4	3	4	3	5	4	3	2	1	4	4	3	4	3	2	4	3	4	4	3	3	2	5	5	5	3	3	4	4	2	5	5
1	2	1	2	3	5	3	4	1	3	5	3	2	4	2	4	1	3	5	2	1	5	3	3	4	5	4	3	4	4	2	4	4	2	4	4
1	3	1	5	3	3	3	2	3	2	4	5	1	4	5	4	4	4	2	5	4	3	3	2	4	5	4	4	4	2	5	3	3	5	2	3
1	2	1	2	3	3	3	3	5	3	3	3	4	2	4	1	4	5	2	2	3	5	4	3	1	5	4	3	5	2	4	4	4	4	2	4
1	2	4	5	3	3	2	4	2	4	2	3	3	5	2	5	4	2	3	2	5	2	4	2	5	5	5	5	5	2	4	3	5	3	5	3
2	2	1	5	5	2	2	5	4	2	5	5	5	2	5	4	5	2	5	3	3	2	2	4	3	5	4	5	4	2	4	4	3	4	3	2
2	2	1	1	3	5	4	4	2	2	4	2	3	5	3	2	4	3	5	2	4	2	4	5	3	5	3	3	4	4	4	1	4	5	5	2
2	2	1	1	3	5	5	3	5	1	4	4	4	3	5	5	4	3	5	4	2	3	5	3	2	3	5	3	1	4	4	4	5	3	3	3
2	3	2	4	4	3	4	4	2	5	4	5	5	2	5	2	4	2	4	4	4	3	4	3	2	3	3	1	2	4	2	2	5	5	4	5
1	1	2	3	4	3	3	2	4	2	4	4	3	4	5	3	5	3	3	4	4	3	5	3	2	4	2	3	4	5	3	3	3	5	4	3
2	2	2	2	5	3	4	5	3	3	4	2	2	3	4	2	3	5	4	5	4	4	4	3	5	3	4	5	1	3	2	2	4	4	4	3
2	2	1	2	3	2	4	3	2	3	4	4	4	3	3	2	5	4	4	5	4	4	4	2	2	3	5	3	4	3	3	4	4	5	5	4
2	2	2	3	3	2	5	2	5	1	4	2	5	5	3	4	5	2	2	3	5	2	5	5	2	3	5	4	4	2	4	5	4	5	4	4
2	3	2	3	5	2	4	5	4	2	4	4	1	3	5	4	4	3	2	4	3	3	4	4	4	3	4	5	5	4	3	3	4	4	4	2
2	1	2	3	4	3	3	4	4	4	5	2	4	4	3	3	3	2	5	4	3	5	4	3	4	5	3	3	4	2	3	3	2	3	4	5
2	1	2	2	2	4	1	4	5	3	5	4	5	4	2	5	3	5	2	4	3	4	4	3	5	3	5	4	3	4	5	5	4	3	4	1
2	3	1	3	3	4	5	4	3	2	4	2	3	3	2	4	3	2	4	2	4	4	3	5	5	3	3	5	4	4	5	2	4	5	4	3
1	3	2	2	3	3	4	3	3	5	5	3	5	2	3	4	2	5	3	5	3	2	4	3	4	3	2	3	4	2	3	3	2	4	4	3
1	3	4	2	5	4	3	4	4	4	4	4	4	2	3	2	3	4	4	5	4	3	4	4	4	5	1	5	5	5	4	4	4	5	4	3
